# Supplementary material for: Comparison of Scheffersomyces stipitis strains CBS 5773 and CBS 6054 with regard to their xylose metabolism: implications for xylose fermentation
Source: PubMed Central journal article supplement (PMC3426399; doi:10.1002/mbo3.5), 2012-03
Supplement: mbo30001-0064-SD1.pdf [file mbo30001-0064-SD1.pdf]

1 **Table S1: Comparison of xylose-fermenting strains of *Saccharomyces* harboring genes**  
 2 **encoding *PsXR* and *PsXDH* from *P. stipitis* CBS 5773 and CBS 6054.**

| Strain                   | XR XDH<br>from CBS | <i>Saccharomyces</i><br>background | Initial xylose<br>conc. (g/L) | $Y_{\text{ethanol}}$<br>(g/g) | $Y_{\text{xylitol}}$<br>(g/g) | Ref. |
|--------------------------|--------------------|------------------------------------|-------------------------------|-------------------------------|-------------------------------|------|
| 1400(pLNH32)             | 5773               | 1400 <sup>d</sup>                  | 80                            | 0.34                          | 0.06                          | (1)  |
| 1400(pLNH32)             | 5773               | 1400 <sup>d</sup>                  | 50                            | 0.3                           | 0.08                          | (2)  |
| MA-N4                    | 5773               | INVSc1                             | 45                            | 0.34                          | 0.10                          | (3)  |
| MA-R4                    | 5773               | IR-2                               | 45                            | 0.35                          | 0.04                          | (4)  |
| MA-D4                    | 5773               | D452-2                             | 45                            | 0.35                          | 0.08                          | (4)  |
| MA-T4                    | 5773               | Type-II                            | 45                            | 0.34                          | 0.09                          | (4)  |
| H158-pXks <sup>a</sup>   | 6054               | GPY55-15 $\alpha$                  | 80                            | 0.22                          | 0                             | (5)  |
| H158-pXks <sup>b</sup>   | 6054               | GPY55-15 $\alpha$                  | 80                            | 0.27                          | 0.03                          | (5)  |
| CEN.PK-pXks <sup>a</sup> | 6054               | CenPK2-1C                          | 80                            | 0.16                          | 0.25                          | (5)  |
| CEN.PK-pXks <sup>b</sup> | 6054               | CenPK2-1C                          | 80                            | 0.21                          | 0.36                          | (5)  |
| TMB3001                  | 6054               | CenPK 113-7A                       | 50                            | 0.31                          | 0.29                          | (6)  |
| TMB3001                  | 6054               | CenPK 113-7A                       | 10                            | 0.44                          | 0.21                          | (7)  |
| TMB3260 <sup>c</sup>     | 6054               | CenPK 113-7A                       | 50                            | 0.30                          | 0.13                          | (8)  |
| TMB3250                  | 6054               | ENY.WA-1A                          | 50                            | 0.30                          | 0.30                          | (6)  |
| TMB3399                  | 6054               | USM21                              | 20                            | 0.05                          | 0.59                          | (9)  |

3 All strains additionally provide overexpression of the endogenous gene for xylulose kinase.

4 The Table is an update of the summary given by (10).

5 <sup>a</sup> in defined media; <sup>b</sup> in complex media; <sup>c</sup> overproduces XR; <sup>d</sup> Fusion between *Saccharomyces*

6 *diastaticus* and *Saccharomyces uvarum*

1  
2  
3  
4  
5  
6  
7  
8  
9  
10  
11  
12  
13  
14  
15  
16  
17  
18  
19  
20  
21  
22  
23  
24  
25

**References**

1. **Moniruzzaman, M., Dien, B. S., Skory, C. D., Chen, Z. D., Hespell, R. B., Ho, N. W. Y., Dale, B. E., and Bothast, R. J.:** Fermentation of corn fibre sugars by an engineered xylose utilizing *Saccharomyces* yeast strain, *World J. Microbiol. Biotechnol.*, **13**, 341-346 (1997).

2. **Ho, N. W., Chen, Z., and Brainard, A. P.:** Genetically engineered *Saccharomyces* yeast capable of effective cofermentation of glucose and xylose, *Appl. Environ. Microbiol.*, **64**, 1852-1859 (1998).

3. **Matsushika, A., Watanabe, S., Kodaki, T., Makino, K., Inoue, H., Murakami, K., Takimura, O., and Sawayama, S.:** Expression of protein engineered NADP+-dependent xylitol dehydrogenase increases ethanol production from xylose in recombinant *Saccharomyces cerevisiae*, *Appl. Microbiol. Biotechnol.*, **81**, 243-255 (2008).

4. **Matsushika, A., Inoue, H., Murakami, K., Takimura, O., and Sawayama, S.:** Bioethanol production performance of five recombinant strains of laboratory and industrial xylose-fermenting *Saccharomyces cerevisiae*, *Bioresour. Technol.*, **100**, 2392-2398 (2009).

5. **Johansson, B., Christensson, C., Hobley, T., and Hahn-Hägerdal, B.:** Xylulokinase overexpression in two strains of *Saccharomyces cerevisiae* also expressing xylose reductase and xylitol dehydrogenase and its effect on fermentation of xylose and lignocellulosic hydrolysate, *Appl. Environ. Microbiol.*, **67**, 4249-4255 (2001).

6. **Jeppsson, M., Johansson, B., Hahn-Hägerdal, B., and Gorwa-Grauslund, M. F.:** Reduced oxidative pentose phosphate pathway flux in recombinant xylose-utilizing *Saccharomyces cerevisiae* strains improves the ethanol yield from xylose, *Appl. Environ. Microbiol.*, **68**, 1604-1609 (2002).

1

2 **7. Träff-Bjerre, K. L., Jeppsson, M., Hahn-Hägerdal, B., and Gorwa-Grauslund, M. F.:**

3 Endogenous NADPH-dependent aldose reductase activity influences product formation

4 during xylose consumption in recombinant *Saccharomyces cerevisiae*, *Yeast*, **21**, 141-150

5 (2004).

6 **8. Jeppsson, M., Träff, K., Johansson, B., Hahn-Hägerdal, B., and Gorwa-Grauslund,**

7 **M. F.:** Effect of enhanced xylose reductase activity on xylose consumption and product

8 distribution in xylose-fermenting recombinant *Saccharomyces cerevisiae*, *FEMS Yeast Res.*,

9 **3**, 167-175 (2003).

10 **9. Wahlbom, C. F., van Zyl, W. H., Jönsson, L. J., Hahn-Hägerdal, B., and Otero, R. R.:**

11 Generation of the improved recombinant xylose-utilizing *Saccharomyces cerevisiae* TMB

12 3400 by random mutagenesis and physiological comparison with *Pichia stipitis* CBS 6054,

13 *FEMS Yeast Res.*, **3**, 319-326 (2003).

14 **10. Chu, B. C. and Lee, H.:** Genetic improvement of *Saccharomyces cerevisiae* for xylose

15 fermentation, *Biotechnol. Adv.*, **25**, 425-441 (2007).
